# Supplementary figures and images for: Nanomedicine-mediated co-expression of a PD-1 blockade agent and CXCL9 synergizes T cell infiltration and activation in solid tumors
Source: Royal Society of Chemistry journal article supplement (doi:10.1039/d5bm01105a), 2025-01-01

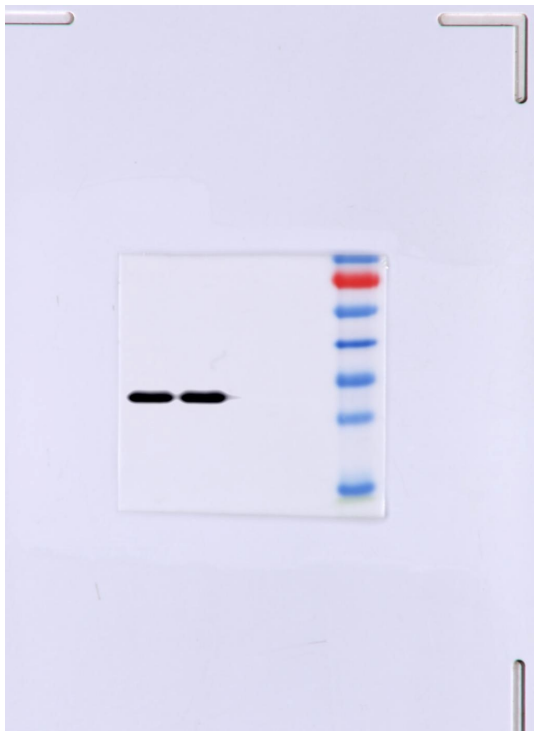

Supplement: d5bm01105a2.pdf [file d5bm01105a2.pdf]
